# Supplementary material
Source: HighWire-hosted journal article supplement (https://bmjopen.bmj.com/content/7/2/e014166)
Supplement: inline-supplementary-material-1 [file inline-supplementary-material-1.pdf]

## Appendix 1 Sample search strategy for MEDLINE

1. exp shock/ or shock.mp.
2. (multiple adj3 organ adj3 failure). mp.
3. (shock adj3 cardiogenic). mp.
4. (shock adj3 hemorrhagic). mp.
5. (shock adj3 surgical). mp.
6. (shock adj3 traumatic). mp.
7. (systemic inflammatory adj3 response adj3 syndrome). mp.
8. \*Hypotension/ or resuscitation/ or critical care/
9. 1 or 2 or 3 or 4 or 5 or 6 or 7 or 8
10. exp vasoconstrictor agents/ or exp vasopressins/
11. (vasoconstrictive adj3 agents). mp.
12. exp cardiogenic agents/
13. (cardiogenic adj3 agent).mp.
14. (vasopressor or vasoconstrictor). mp.
15. exp catecholamines/ or catecholamine.mp.
16. exp epinephrine/ or epinephrine.mp.
17. adrenaline.mp.
18. norepinephrine/ or norepinephrine.mp.
19. noradrenaline.mp.
20. exp isoproterenol/ or isoprenaline.mp.
21. exp metaproterenol/ or orciprenaline.mp.
22. exp ephedrine/ or ephedrine.mp.
23. exp phenylephrine/ or phenylephrine.mp.
24. exp dopamine agents/ or exp dopamine/ or exp dopamine agonists or dopamine.mp.
25. dobutamine.mp. or exp dobutamine/
26. vasopressin.mp. or exp vasopressins/
27. arginine vasopressin.mp or exp arginine vasopressin/
28. desmopressin.mp. or exp deamino arginine vasopressin/
29. lyopressin.mp. exp lyopressin/
30. ornipressin.mp. or exp ornipressin/
31. terlipressin.mp.
32. (glypressin or pitressin). mp.
33. felypressin.mp. or exp felypressin/
34. synephrine.mp. or exp synephrine/
35. or/10-34
36. 9 and 35
37. rct\* .mp.
38. randomized controlled trial.mp. or exp Randomized Controlled Trial/
39. (randomized adj3 control : adj3 trial :).mp.
40. exp Controlled Clinical Trial/
41. (controlled adj3 clinical adj3 trial).mp.
42. (clinical adj3 trial :).mp.
43. (experimental adj3 trial :).mp.

44. exp Clinical Study/
45. (clinical adj3 study).mp.
46. Comparative Study/
47. (comparative adj3 study). mp.
48. exp Evaluation Studies/
49. (evaluation adj3 study).mp.
50. exp Multicenter Study/
51. (multicenter adj3 study).mp.
52. exp Observational Study/ or prospective studies/ or retrospective studies/
53. (observational adj3 study).mp.
54. exp Case-Control Studies/
55. (case adj3 control adj3 studies).mp.
56. exp Cohort Studies/
57. (cohort adj3 studies).mp.
58. or/37-57
59. 36 and 58
60. (animals not (humans and animals)).sh.
61. 59 and 60
